# Supplementary material for: Evolutionary origins of Brassicaceae specific genes in Arabidopsis thaliana
Source: Springer Nature journal article supplement (doi:10.1186/1471-2148-11-47), 2011-02-18

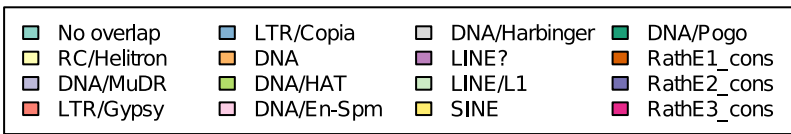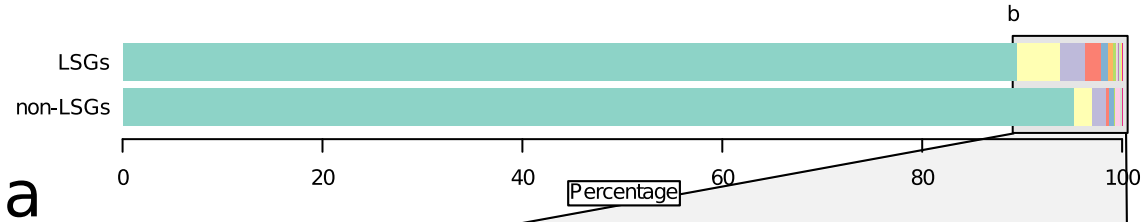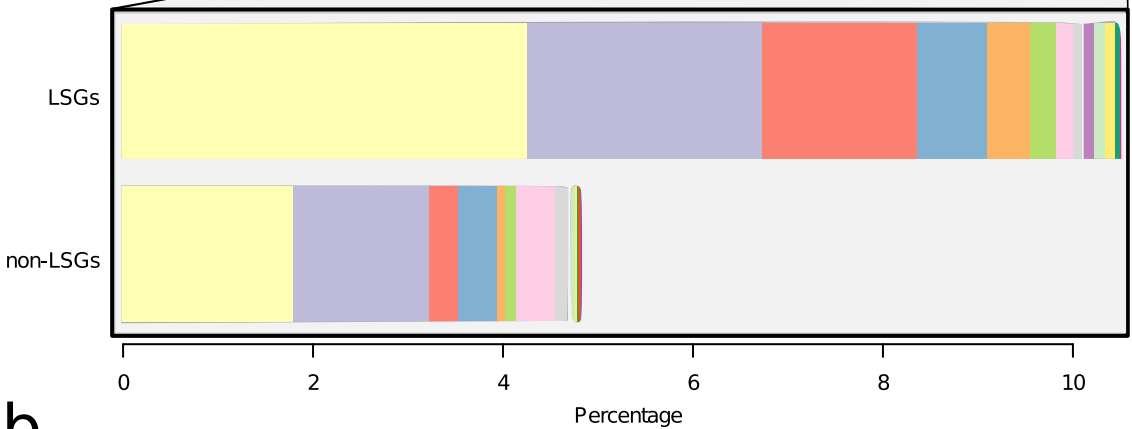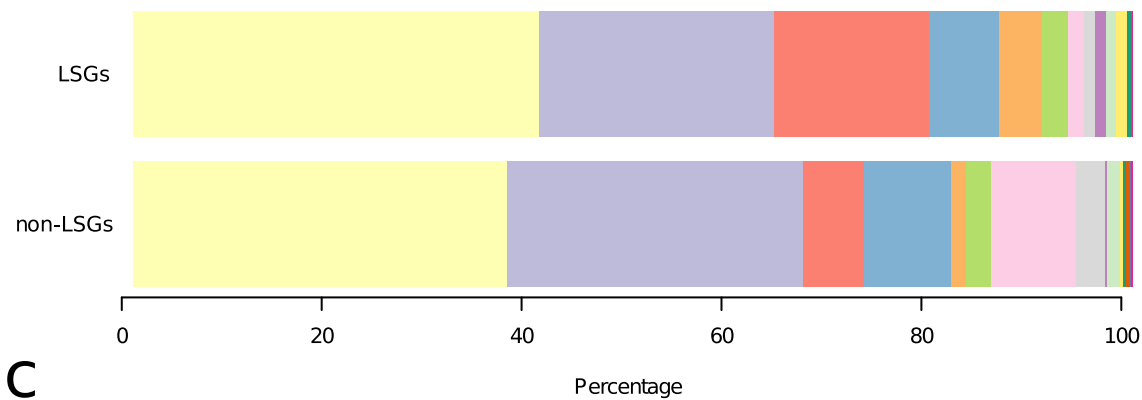

Supplement: 12862_2010_1654_MOESM17_ESM.pdf [file 12862_2010_1654_MOESM17_ESM.pdf]
