# Supplementary material for: Evolutionary origins of Brassicaceae specific genes in Arabidopsis thaliana
Source: Springer Nature journal article supplement (doi:10.1186/1471-2148-11-47), 2011-02-18
Supplement: 12862_2010_1654_MOESM19_ESM.pdf [file 12862_2010_1654_MOESM19_ESM.pdf]

*A. thaliana*-only lineage specific gene

Number of ISC and MSC per accession

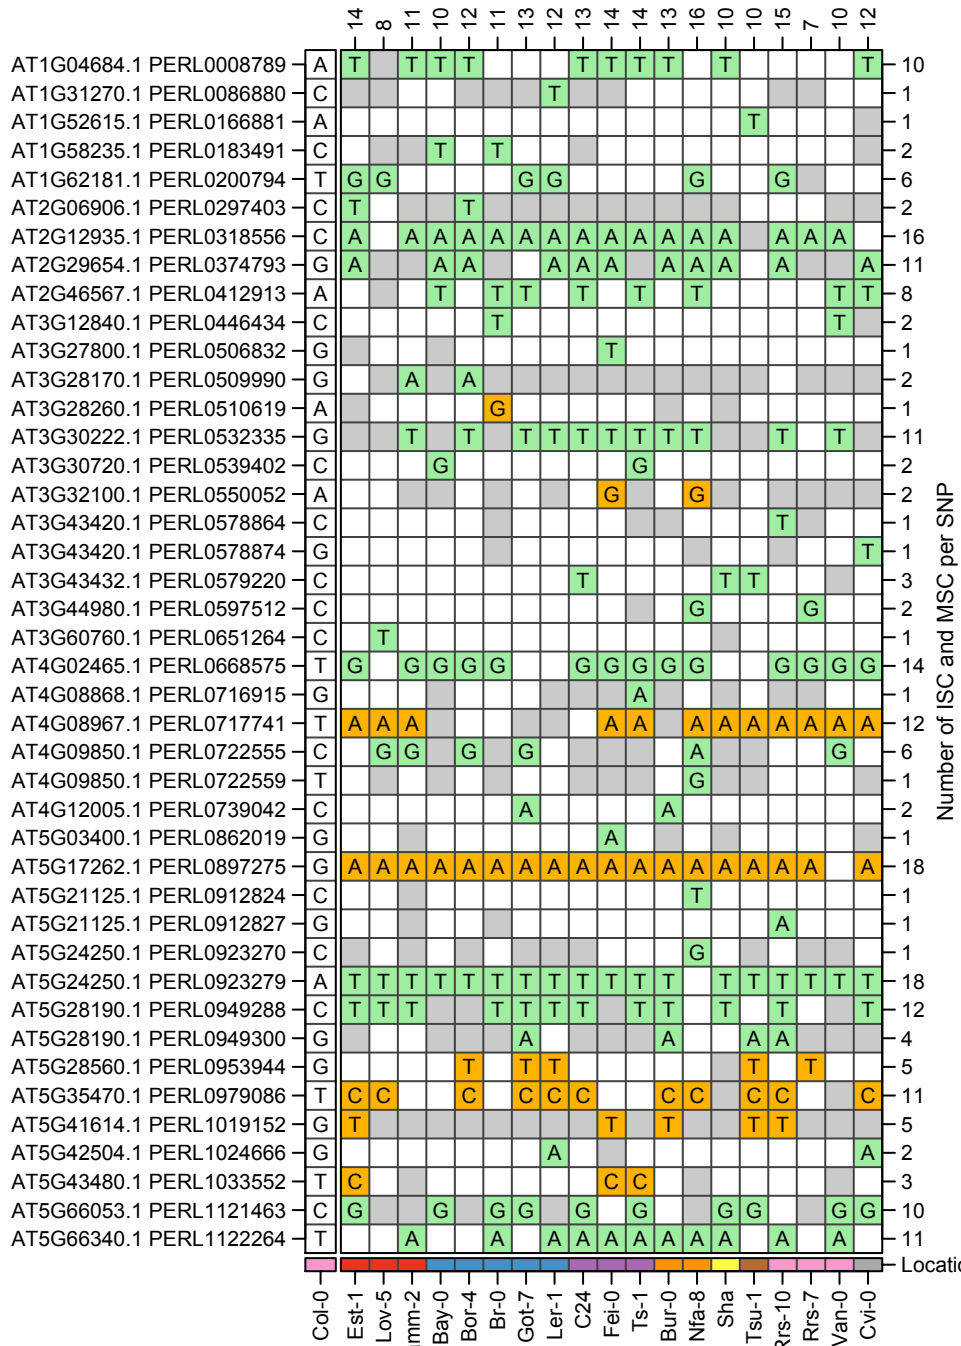

*A. lyrata* intergenic alignments

|   |   |       |
|---|---|-------|
|   | 1 | 0.67  |
|   | 0 | 0.255 |
| X | - | -     |
|   | 1 | 0.297 |
| G | 1 | 0.909 |
| X | - | -     |
|   | 0 | 0.823 |
| A | 4 | 0.917 |
|   | 0 | 1     |
| X | - | -     |
|   | 0 | 0.5   |
|   | 0 | 0.101 |
| G | 0 | 0.193 |
|   | 1 | 0.505 |
| X | - | -     |
| X | - | -     |
| X | - | -     |
| X | - | -     |
| X | - | -     |
|   | 0 | 0.254 |
| G | 2 | 0.766 |
|   | 0 | 0.164 |
| X | - | -     |
| G | 0 | 0.225 |
|   | 0 | 0.225 |
|   | 1 | 0.75  |
|   | 0 | 0.171 |
|   | 0 | 0.884 |
| X | - | -     |
| X | - | -     |
| - | 6 | 0.819 |
|   | 6 | 0.819 |
| X | - | -     |
| X | - | -     |
|   | 0 | 0.238 |
|   | 0 | 0.1   |
| X | - | -     |
|   | 0 | 0.147 |
|   | 0 | 0.198 |
|   | 1 | 0.958 |
|   | 0 | 0.303 |

Genome accession

Number of ISC and MSC per SNP

Location

*A. lyrata*  
# indel/ISC  
coverage
